# Supplementary material for: Hf-based UiO-66-type solid electrolytes for all-solid-state lithium batteries
Source: Royal Society of Chemistry journal article supplement (doi:10.1039/d2nj00090c), 2022-01-01
Supplement: d2nj00090c1.pdf [file d2nj00090c1.pdf]

## Hf-based UiO-66 type solid electrolytes for all-solid-state lithium batteries

Jia Zhang, Yao Zhang\*, Zhiyuan Zhou and Yanfang Gao\*

College of Chemical Technology, Inner Mongolia University of Technology, No. 49 Aimin Street, Xincheng District,

Hohhot 010050, China

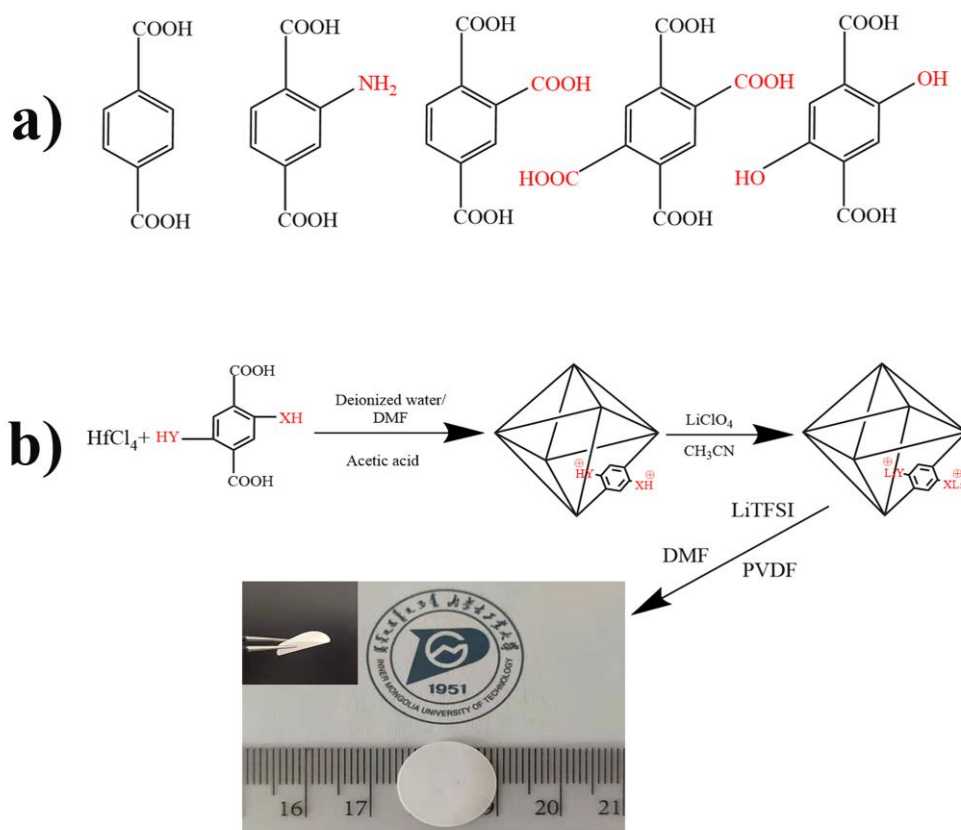

Fig. S1 a) Ligand of MOF-based SEs; b) Synthetic procedure of electrolyte membrane and photographs of Li/HLMOF-4 electrolyte membrane.

\* Corresponding author: [zhangyao@imut.edu.cn](mailto:zhangyao@imut.edu.cn) (Y. Zhang), [yf\\_gao@imut.edu.cn](mailto:yf_gao@imut.edu.cn) (Y. Gao)

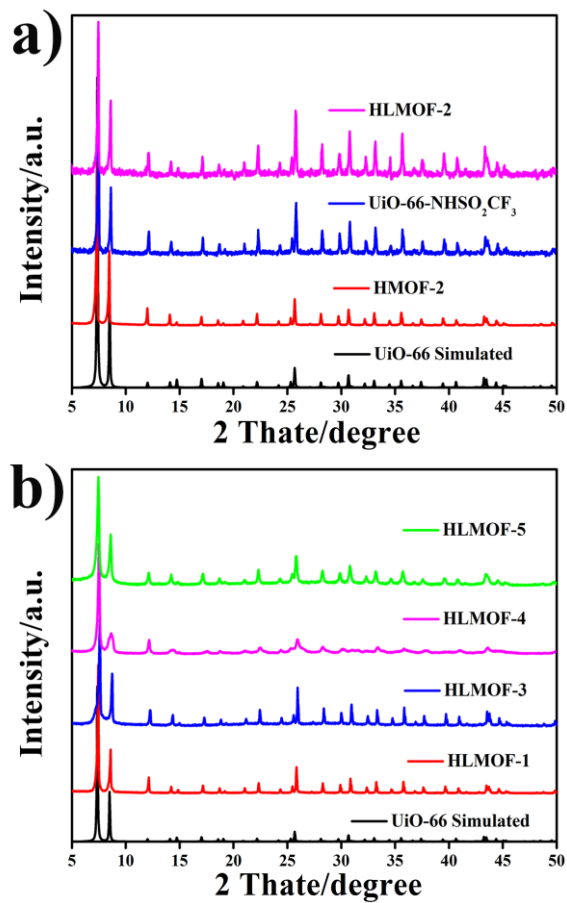

Fig. S2 The XRD of a) HLMOF-2; b) HLMOFs.

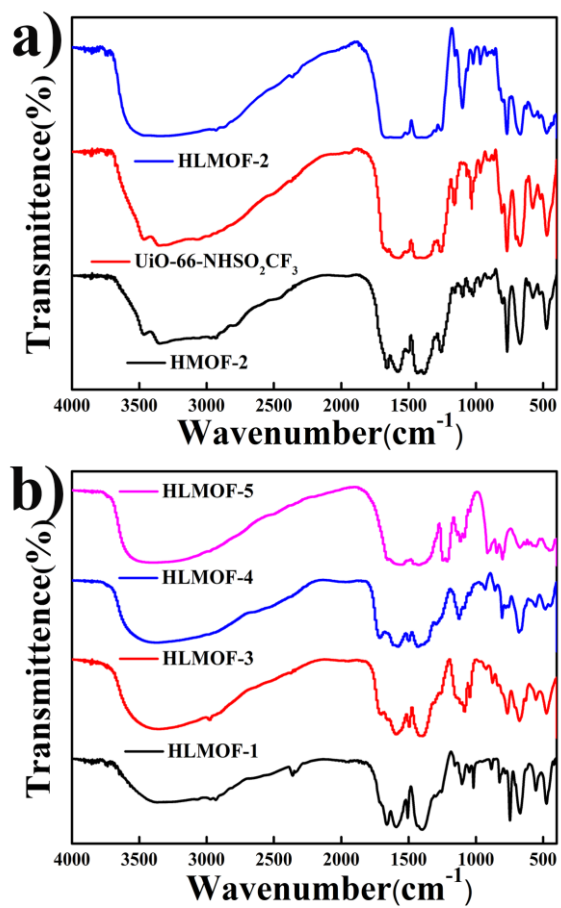

Fig. S3 FT-IR of a) HMOF-2, UiO-66-NHSO<sub>2</sub>CF<sub>3</sub>, HLMOF-2; b) HLMOFs.

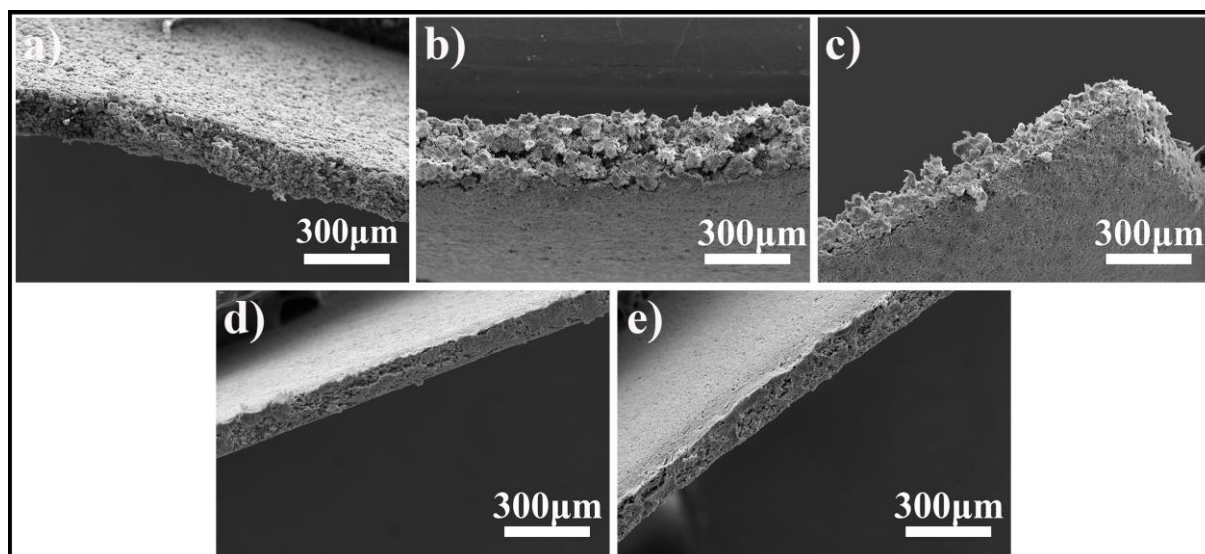

Fig. S4 The SEM of electrolyte membrane a) Li/HLMOF-1; b) Li/ HLMOF-2; c) Li/ HLMOF-3; d) Li/ HLMOF-4; e) Li/ HLMOF-5 at the scale of cross-sectional diagram.

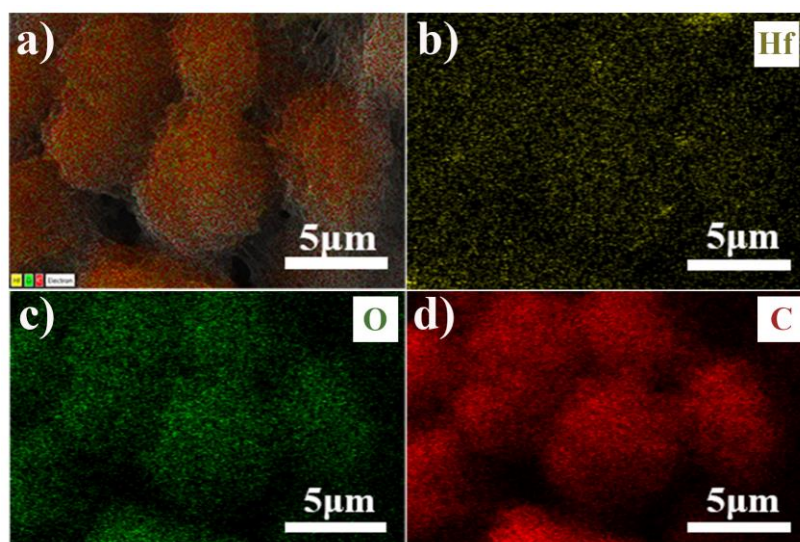

Fig. S5 EDS elemental analysis of the Li/HLMOF-1. a) EDS elemental mapping of all elements. EDS mapping of b) Hf element, c) O element and d) C element.

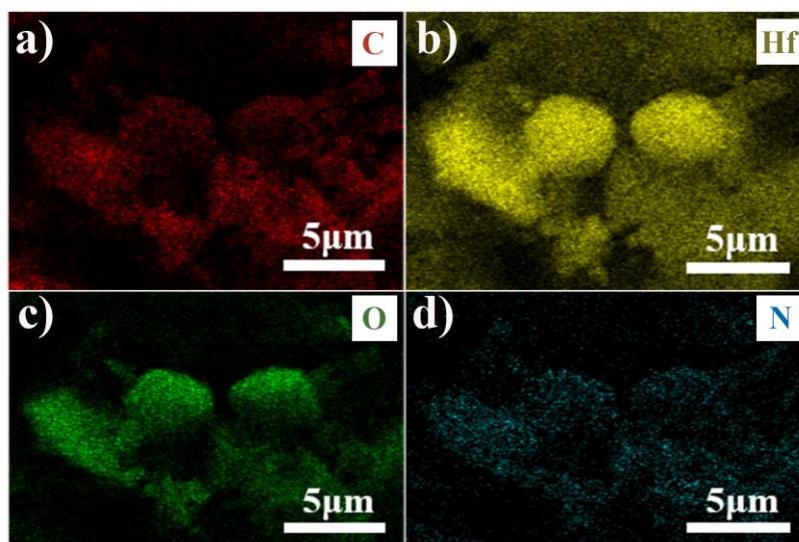

Fig. S6 EDS elemental analysis of the Li/HLMOF-2. EDS mapping of a) C element, b) Hf element, c) O element and d) N element.

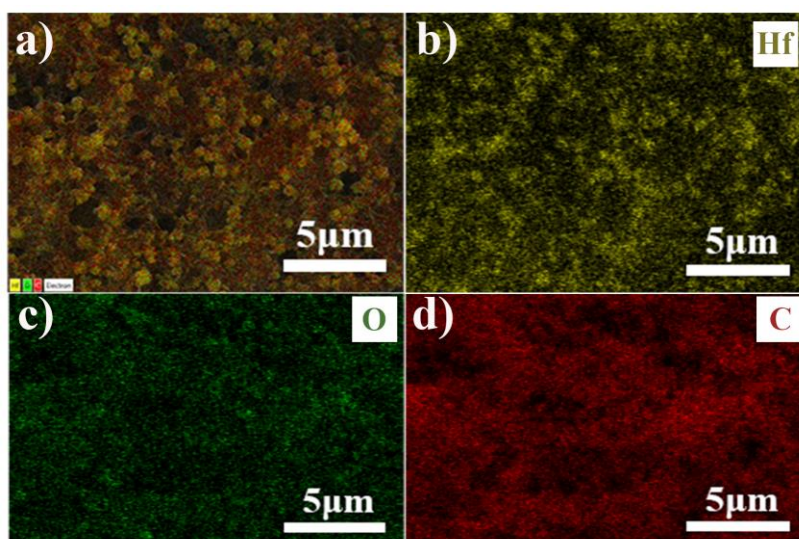

Fig. S7 EDS elemental analysis of the Li/HLMOF-3. a) EDS elemental mapping of all elements. EDS mapping of b) Hf element, c) O element and d) C element.



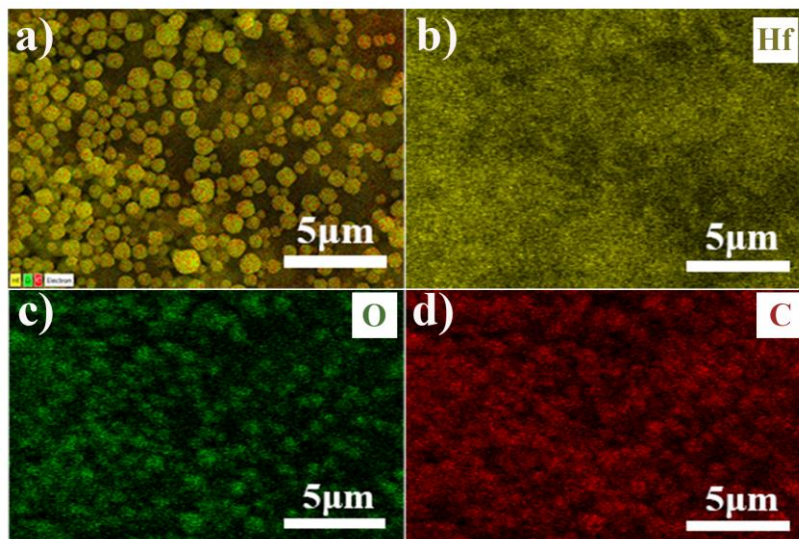

Fig. S8 EDS elemental analysis of the Li/HLMOF-4. a) EDS elemental mapping of all elements. EDS mapping of b) Hf element, c) O element and d) C element.

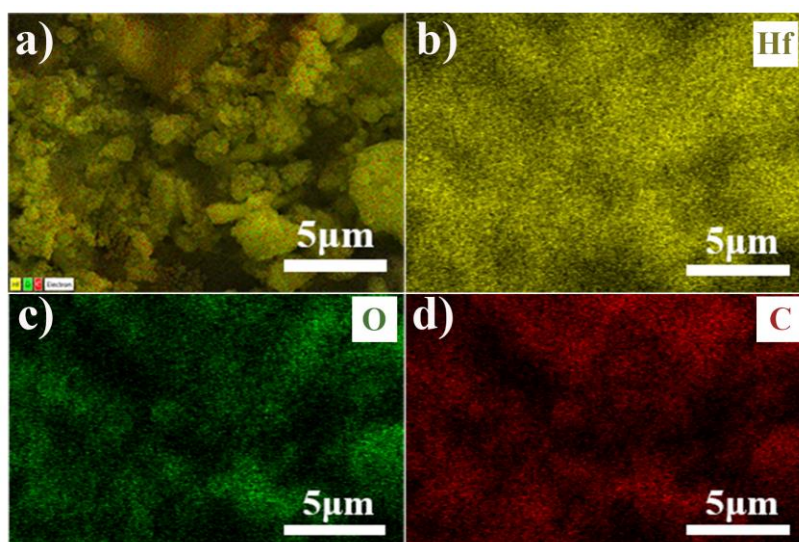

Fig. S9 EDS elemental analysis of the Li/HLMOF-5. a) EDS elemental mapping of all elements. EDS mapping of b) Hf element, c) O element and d) C element.

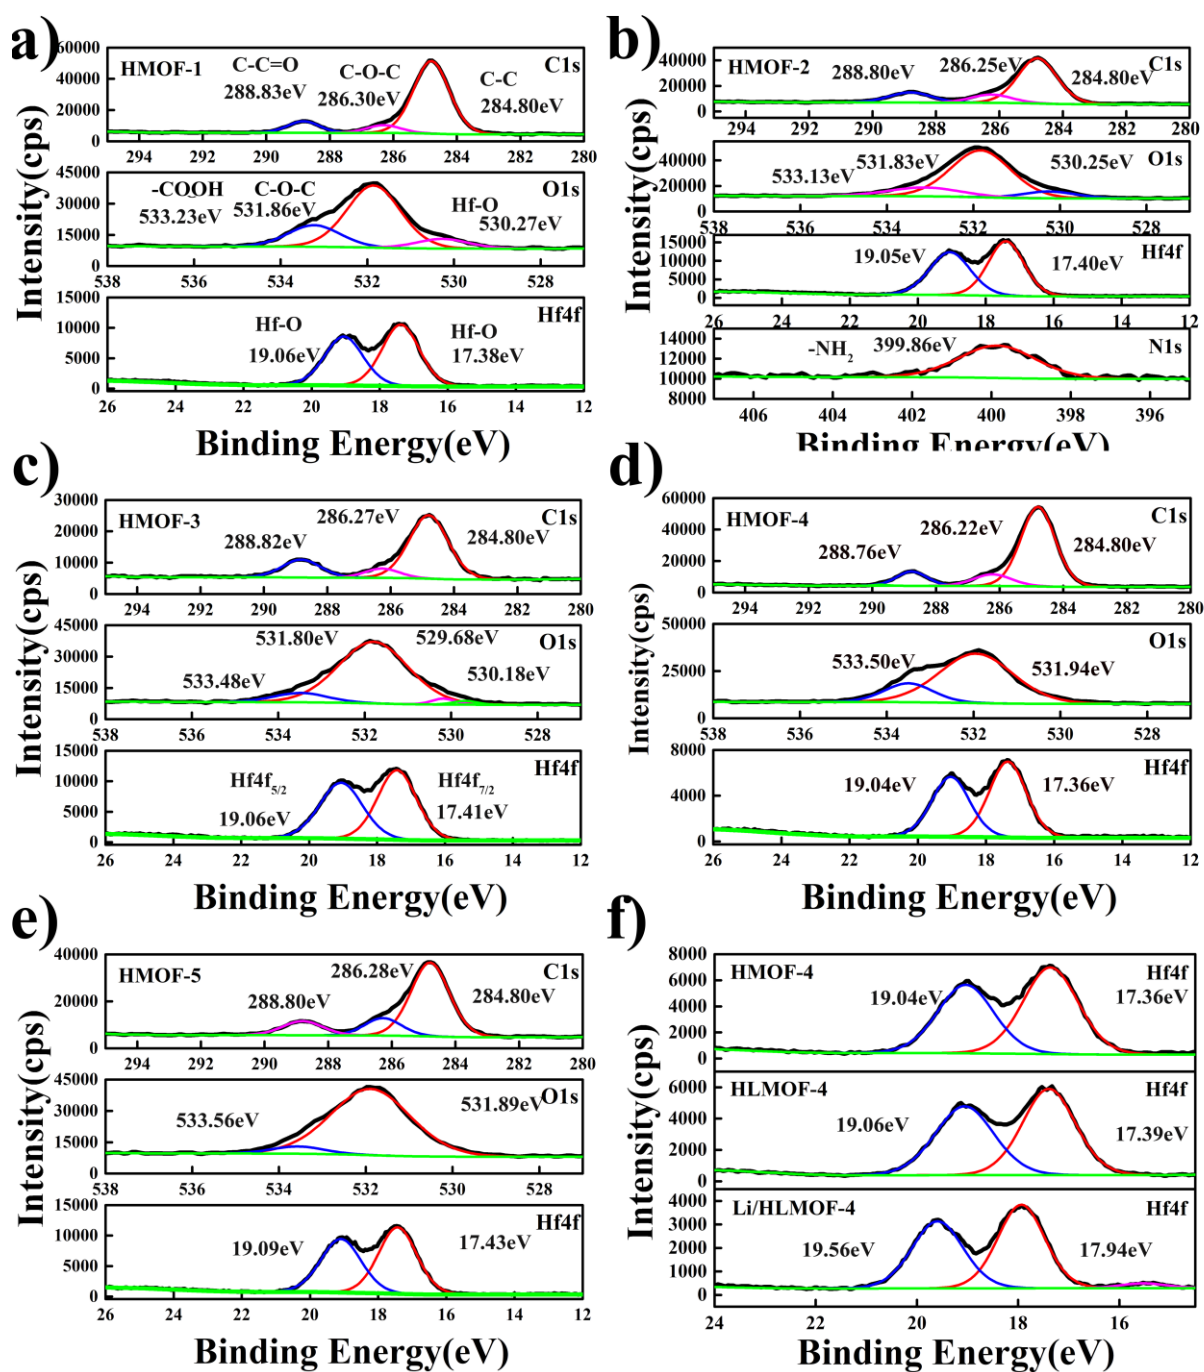

Fig. S10 XPS spectra of a) HMOF-1; b) HMOF-2; c) HMOF-3; d) HMOF-4; e) HMOF-5 and f) Hf 4f core-level spectrum of HMOF-4, HLMOF-4 and Li/HLMOF-4.

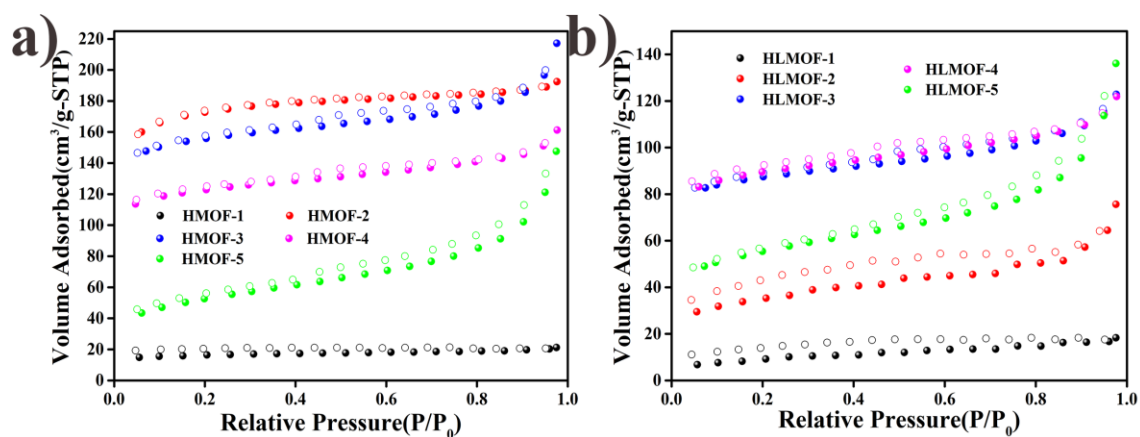

Fig. S11 N<sub>2</sub> adsorption- desorption profiles at 77 K for a) HMOFs and b) HLMOFs.

Table S1 BET of HMOFs and HLMOFs.

|        |         | Multi-point BET Surface Area<br>m <sup>2</sup> /g |
|--------|---------|---------------------------------------------------|
|        | HMOF-1  | 50.556                                            |
|        | HMOF-2  | 526.445                                           |
| HMOFs  | HMOF-3  | 471.635                                           |
|        | HMOF-4  | 380.084                                           |
|        | HMOF-5  | 174.561                                           |
|        | HLMOF-1 | 32.946                                            |
|        | HLMOF-2 | 116.175                                           |
| HLMOFs | HLMOF-3 | 265.439                                           |
|        | HLMOF-4 | 275.277                                           |
|        | HLMOF-5 | 178.575                                           |



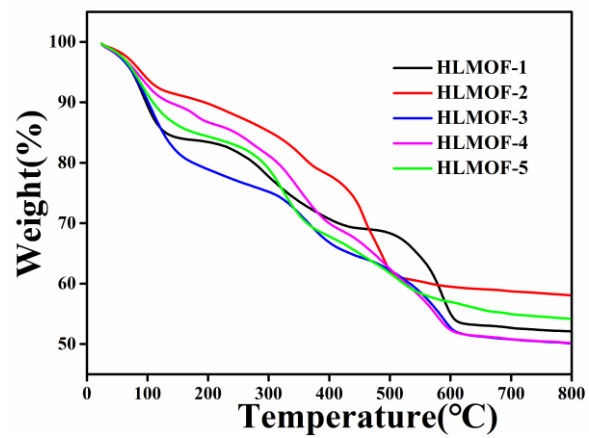

Fig. S12 TGA curves of the HLMOFs.

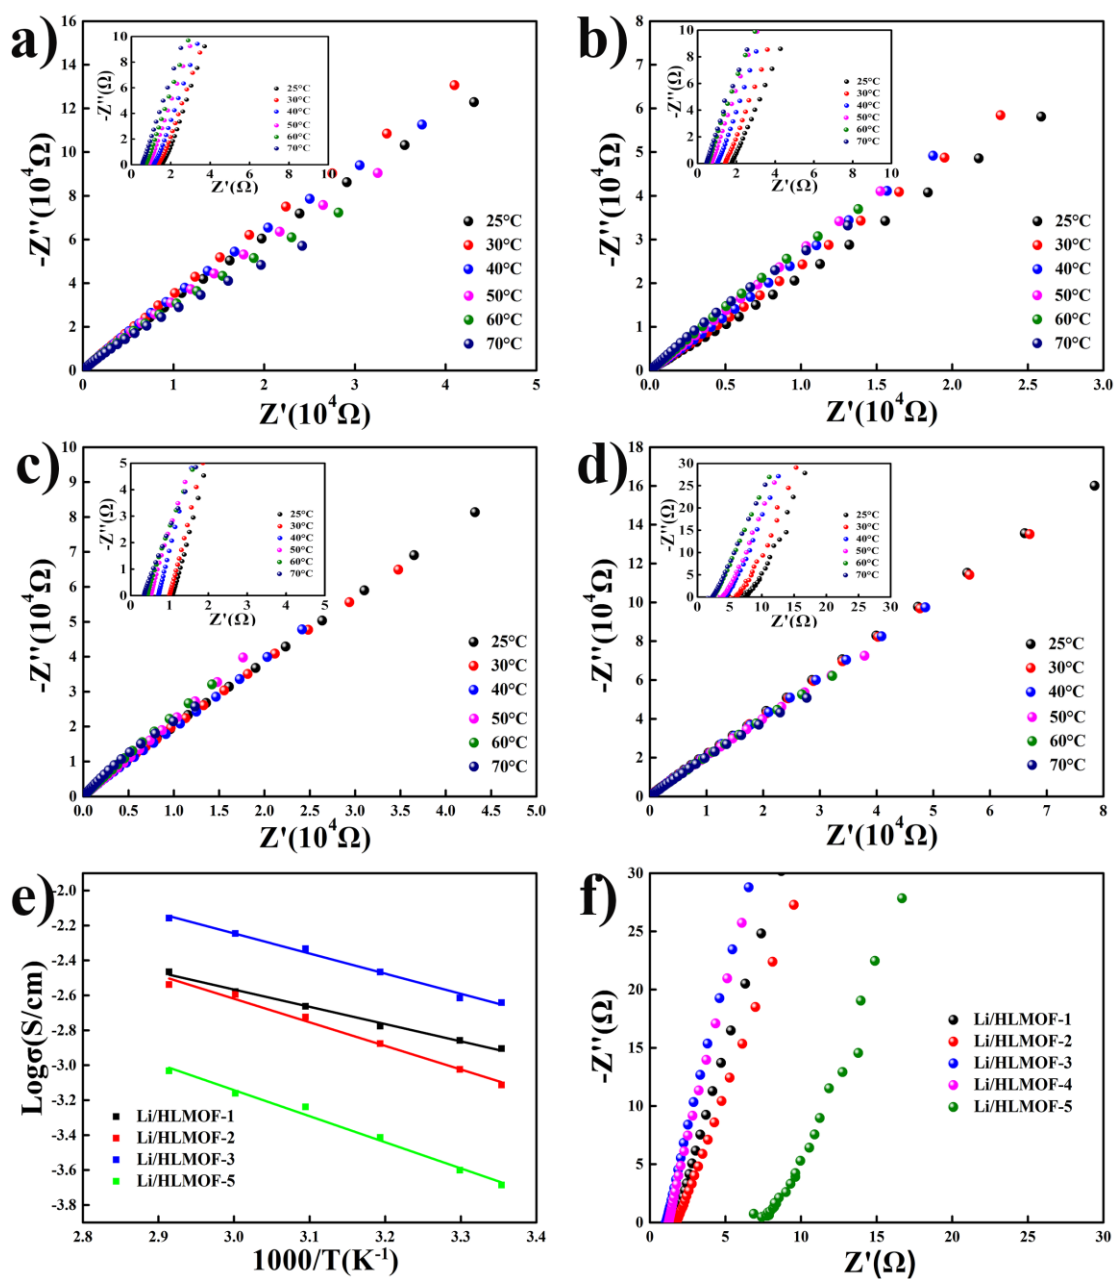

Fig. S13 EIS plots of a) Li/HLMOF-1 b) Li/HLMOF-2; c) Li/HLMOF-3; d) Li/HLMOF-5 electrolyte at temperatures from 25 °C to 70 °C; e) Arrhenius plots of electrolyte membrane; f) EIS plot of Li/HLMOFs at 25 °C.

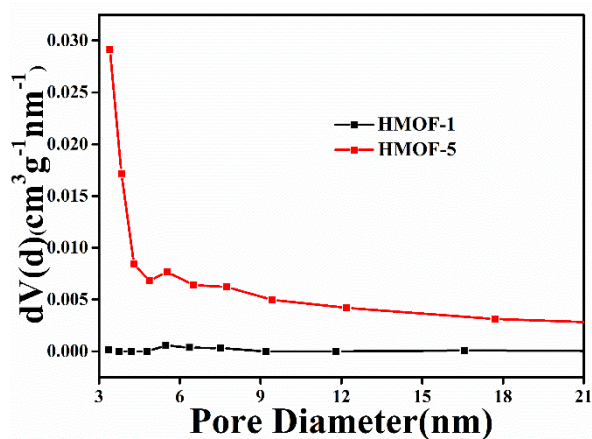

Fig. S14 The pore size distribution of HMOF-1 and HMOF-5.

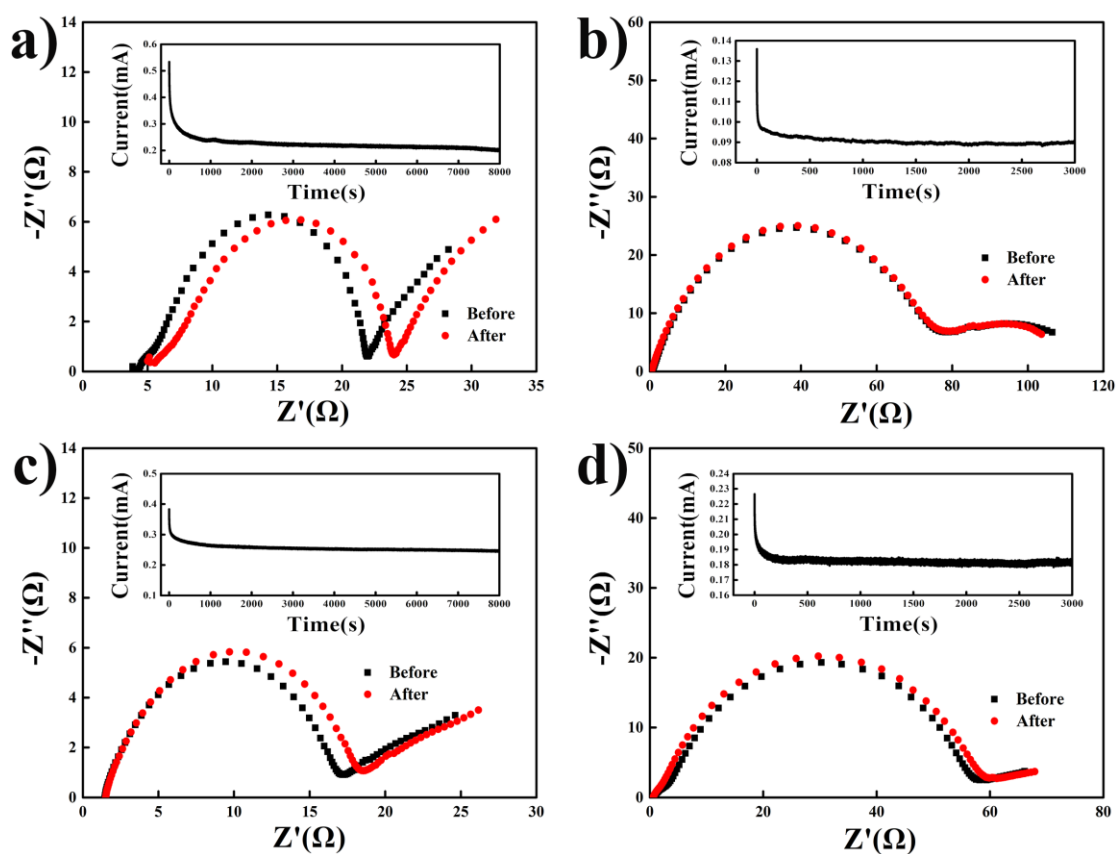

Fig. S15 EIS before and after polarization of the electrolyte of a) Li/HMOF-1; b) Li/HMOF-2; c) Li/HMOF-3; d) Li/HMOF-5; the inset is current-time curve at 10 mV of polarization.

Table S2 Summary of solid-state electrolytes.

| Electrolyte membrane | Ionic conductivity<br>S/cm (25°C) | Potential window<br>V | Ion transference number |
|----------------------|-----------------------------------|-----------------------|-------------------------|
| Li/HLMOF-1           | $1.25 \times 10^{-3}$             | 1.50-4.55             | 0.20                    |
| Li/HLMOF-2           | $7.72 \times 10^{-4}$             | 1.40-4.45             | 0.19                    |
| Li/HLMOF-3           | $2.28 \times 10^{-3}$             | 1.50-4.62             | 0.44                    |
| Li/HLMOF-4           | $2.82 \times 10^{-3}$             | 1.60-4.65             | 0.58                    |
| Li/HLMOF-5           | $2.06 \times 10^{-4}$             | 1.85-3.80             | 0.15                    |

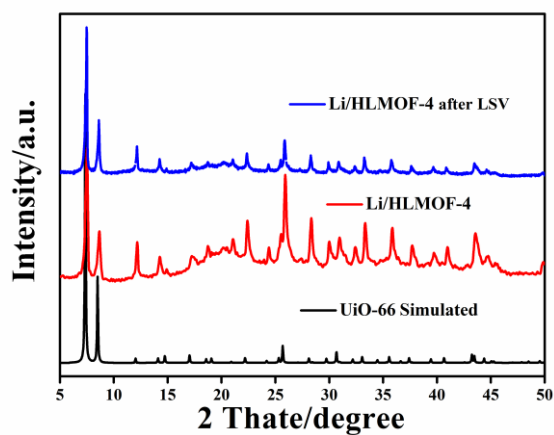

Fig. S16 The XRD of Li/HLMOF-4 electrolyte membrane before and after cycle.

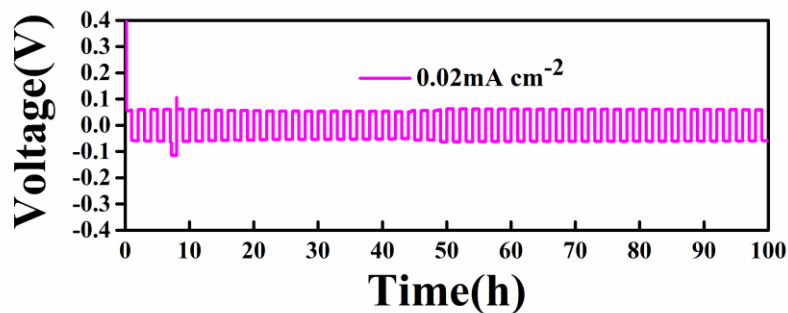Fig. S17 The Li plating and stripping performance of the Li||Li/HLMOF-4||Li cell at a current density of  $0.02 \text{ mA cm}^{-2}$ .

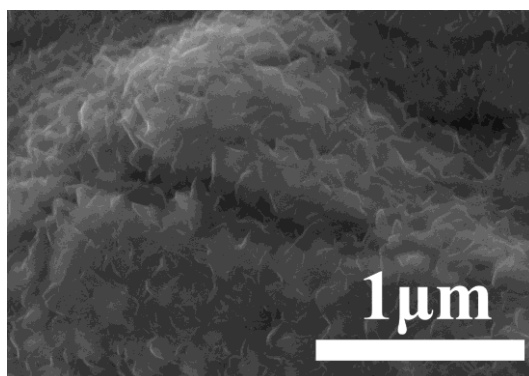

Fig. S18 SEM of lithium foil surface after plating/stripping experiments for Li|Li/HLMOF-4|Li symmetric cell.

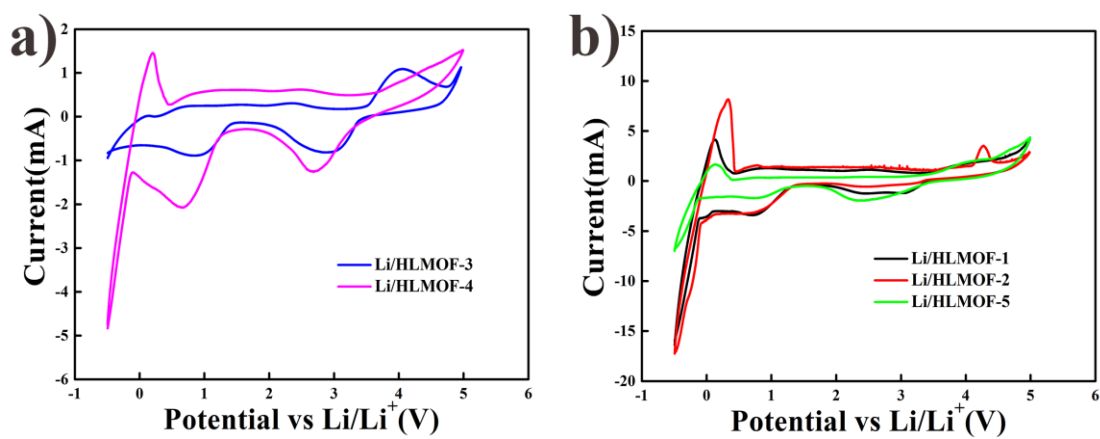

Fig. S19 The CV curve of a) Li/ HLMOF-3, Li/ HLMOF-4; b) Li/ HLMOF-1, Li/ HLMOF-2, Li/ HLMOF-5.
